# Supplementary material
Source: publisher figshare collection journal article supplement (https://karger.figshare.com/ndownloader/files/26481008)

**Supplementary material**

**­­­**

**Figure 1.** Residual analysis model 1.

**Figure 2.** Residual analysis model 2.

**Figure 3.** Residual analysis model 3.


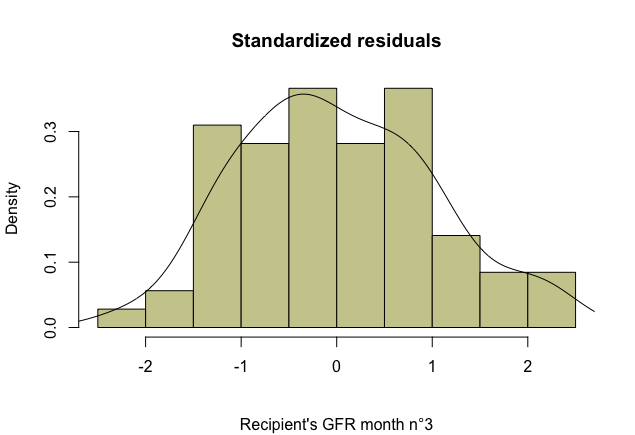

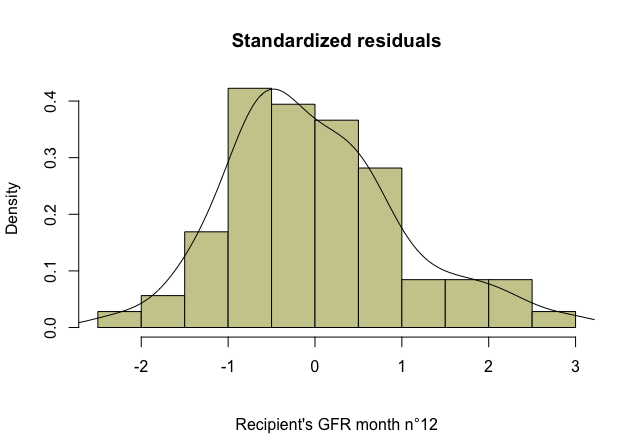

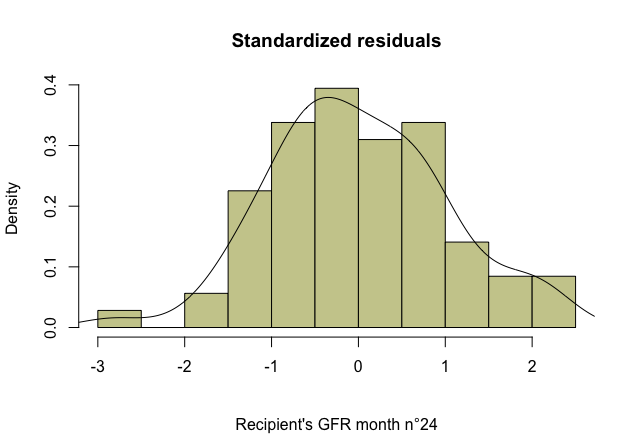

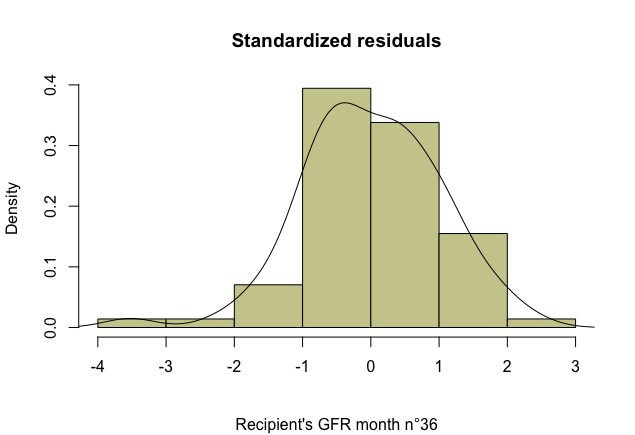

Supplement: Supplementary file 1 [file 26481008]
